# Supplementary material
Source: Springer Nature journal article supplement (https://www.springermedizin.de/resource/supplementary/12960_2012_326_MOESM5_ESM.pdf/9569956)
Supplement: MOESM5 [file 9569956]

## % with Choice among no Initial Choice

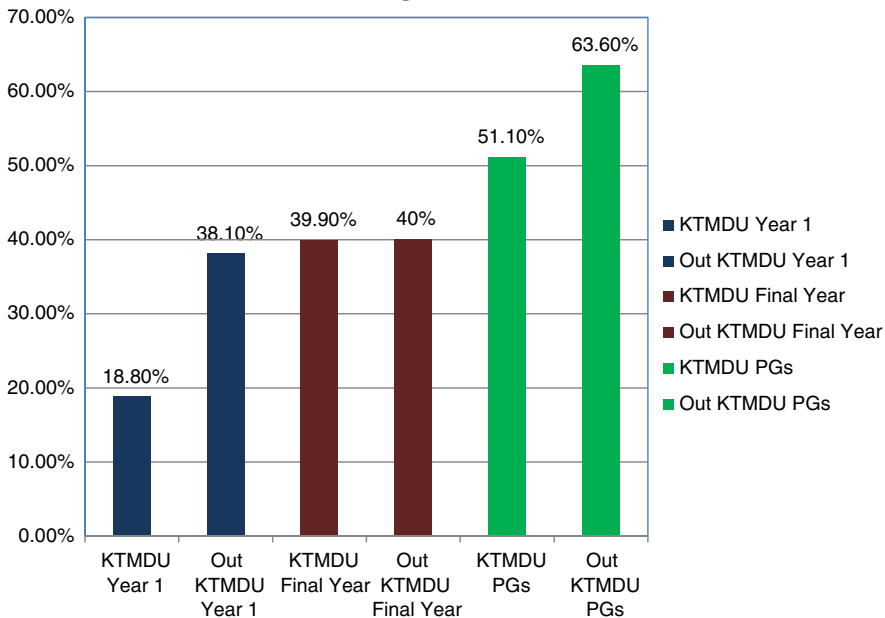

| Category                                                   | Percent of choice | p values (Chi square) using 0.05 as cutoff |
|------------------------------------------------------------|-------------------|--------------------------------------------|
| KTMDU Year 1                                               | 15/80 (18.8%)     | p = 0.009                                  |
| Out KTMDU Year 1                                           | 32/84 (38.1%)     |                                            |
| KTMDU Final Year                                           | 57/143 (39.9%)    | p = 0.98                                   |
| Out KTMDU Final Year                                       | 40/100 (40%)      |                                            |
| KTMDU PGs (did MBBS in Kathmandu)                          | 48/94 (51.1%)     | p = 0.20                                   |
| Out KTMDU PGs (includes 2 who did MBBS out of the country) | 28/44 (63.6%)     |                                            |
